# Supplementary material
Source: PubMed Central journal article supplement (PMC3248283)
Supplement: JCI46252sd.pdf [file JCI46252sd.pdf]

1 **Supplemental figure 1. Temperature and weight curves in monkeys after high dose *M.***  
2 ***tuberculosis* infection**

3 Non-vaccinated, BCG vaccinated and BCG vaccinated/H56 boosted monkeys were infected with  
4 *M.tuberculosis* (500 CFU) and evaluated from 0-64 weeks (every 4 weeks) post challenge. Weight  
5 and temperature of the individual animals were determined at the indicated time points.

6

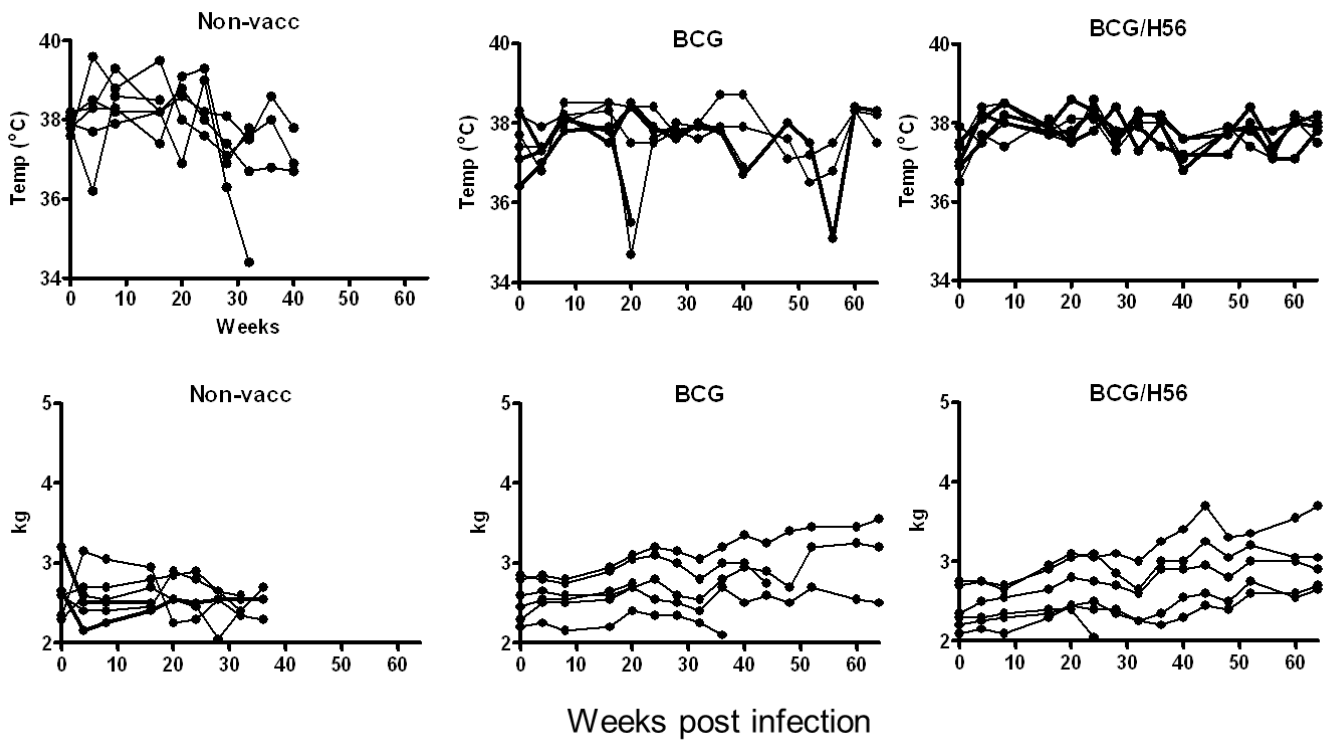

7

8

9

10

11

12

13

14

15 **Supplemental figure 2. IL-2 ELISPOT after vaccination**

16 IL-2 ELISPOT was performed on 200,000 PBMCs/well from BCG and BCG vaccinated/H56  
17 boosted monkeys, stimulated with Ag85B, ESAT-6, Rv2660c, media (negative control, not shown)  
18 or CFP (culture filtrate proteins) for 48 hours as described in materials and methods.

19

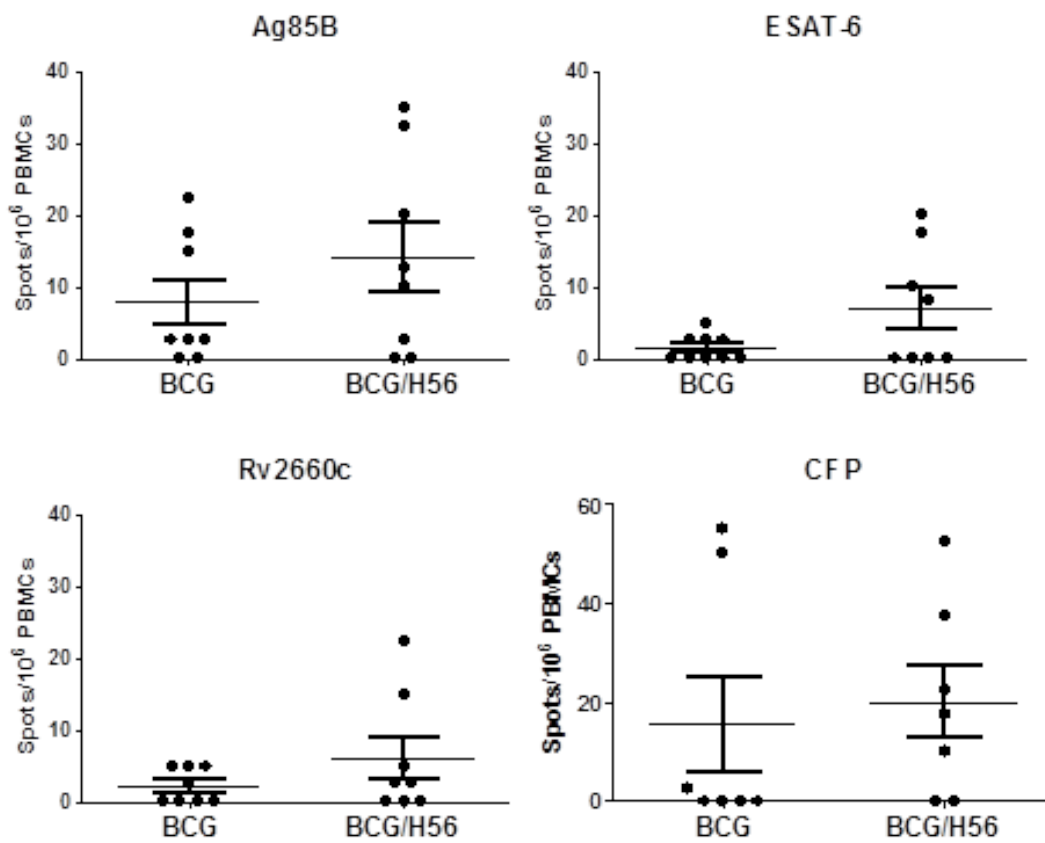

20

21

21 **Supplemental figure 3. Primer and probe sequences.**

22 flanking forward (ff) and flanking reverse (fr) for pre-amplification, forward (f) and reverse, (r)  
23 primers and TaqMan probe (p) for real-time PCR.

24

25

**Rv2660c:**

(ff) gcagcaacaggccaggctag,  
(fr) acaaaatctgggctgcgtgaac,  
(f) gcggcaggcgcacatct,  
(r) gaactgactcggtgcaacca,  
(p) tgcccacgccgaca.

**Rv3875:**

(ff) ggaagcagtcacctgaccaagctc,  
(fr) gccttcggtcgaagccattg,  
(f) accaggggtgtccagcaaaaatg,  
(r) accggcttcgctgatcgt,  
(p) agctgaacaacgcgctg.

**Rv1886c:**

(ff) ggtactaccagtcgggactgtcgatag,  
(fr) cctgttgccggacaaccattg,  
(f) gcgggcagtcagcttctac,  
(r) ggtcaggaaggttcccactg,  
(p) ctgcggaaggctgg.

**Rv2225:**

(ff) gcgcacatgcggtcaagct,  
(fr) gcgtcggcgcgatggttggc,  
(f) ccgagcaaatgcctgtct,  
(r) gccgccaagggttg,  
(p) tgatggcacacatcg.

**Rv3051c:**

(ff) catatcaagtcggtgccctcaatc,  
(fr) tgcccgcaacgcgtgatac,  
(f) gatcgggctaggacagatgaac,  
(r) ggtgaagtcgatgccttcgt,  
(p) ccgggaacgcatct.

**Rv3127:**

(ff) caaagacgttgcatgcttgatg,  
(fr) ggcgtctgatccagcgtatc,  
(f) cgactggtgtagcgtcaca,  
(r) ggtgaagtccaccattcgagtt,  
(p) cgggacgatccgtac

25 **Supplemental figure 4. Antigen specific IFN- $\gamma$  ELISPOT responses in individual monkeys.**

26 Frequency of IFN- $\gamma$  producing T cells specific for vaccine antigens is elevated prior to challenge  
27 and early (<4 weeks) post-challenge in the BCG/H56-vaccinated animals that would become latent  
28 (N=6), but low or absent in the BCG/H56-vaccinated animals (N=2) that developed active TB. The  
29 top 3 panels show responses (IFN- $\gamma$  ELISPOT) from the animals that developed active disease;  
30 three antigens are shown (ESAT-6, Ag85B, Rv2660c) and each line represents an individual  
31 monkey. The bottom 3 panels show the responses from the monkeys who developed latent  
32 infection; each line represents an individual monkey.

33

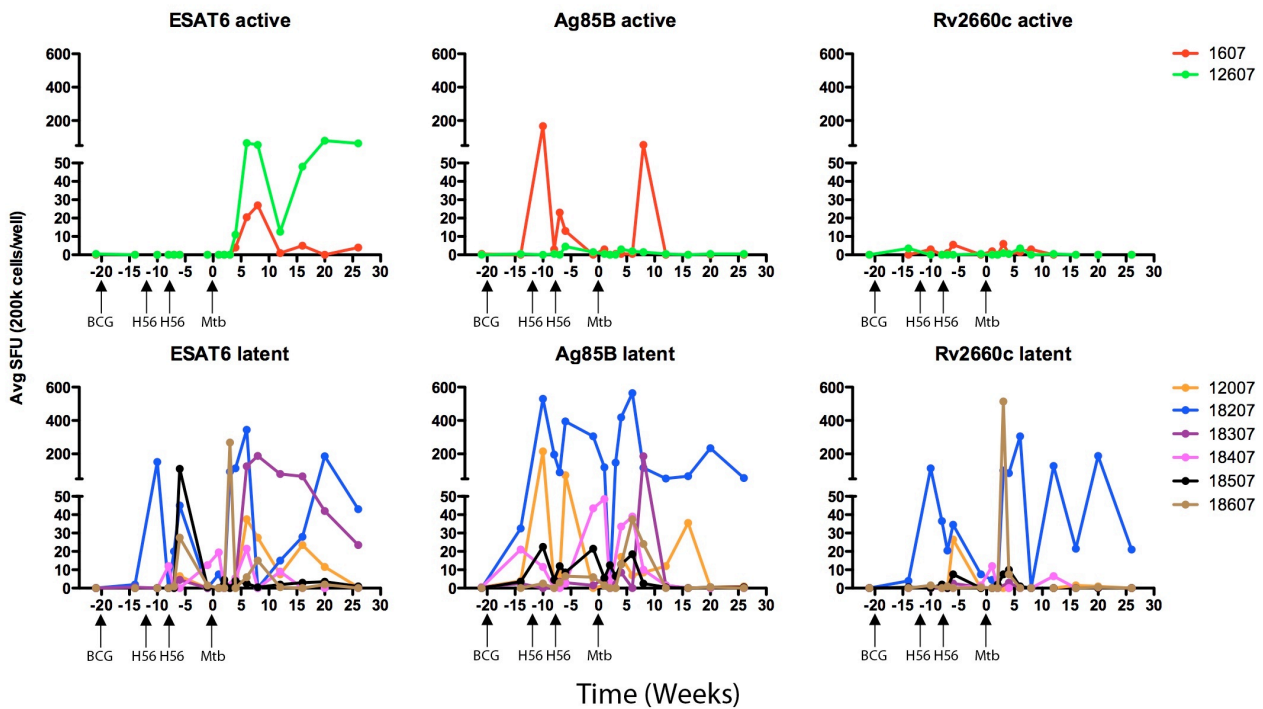

34

35 **Supplemental table 1. Clinical parameters for individual animals after high dose challenge**

36 Non-vaccinated, BCG vaccinated and BCG vaccinated/H56 boosted monkeys were infected with  
 37 *M.tuberculosis* (500 CFU) and evaluated from 0 to 64 weeks (every 4 weeks) post challenge.  
 38 Weight and temperature of the animals were determined at the indicated time points. Erythrocyte  
 39 sedimentation rates were determined on whole blood. X-ray: the animals were scored according the  
 40 following definitions: (-): negative, SN: scattered nodules, BP(u): unilateral bronchopneumonia,  
 41 BP(b): bilateral bronchopneumonia, BP/Con: Bronchopneumonia with consolidation of lung ,  
 42 BP/At: Bronchopneumonia with Atelectasis.

| Weeks | Non Vacc |         |        |        |        |        | BCG    |         |        |        |        |        | BCG/H56 |           |        |          |        |         |
|-------|----------|---------|--------|--------|--------|--------|--------|---------|--------|--------|--------|--------|---------|-----------|--------|----------|--------|---------|
|       | 3008 L   | 5566 E* | 8197 A | 2861 I | 7156 C | 6651 D | 7705 B | 6784 C* | 7947 B | 197 BJ | 4418 J | 5985 C | 8262 A  | S 4708 EC | 5923 D | S 2934 N | 7531 C | 1290 GB |
| 0     | 2.35     | 2.6     | 2.6    | 2.3    | 2.65   | 3.2    | 2.85   | 2.3     | 2.45   | 2.2    | 2.6    | 2.8    | 2.7     | 2.1       | 2.75   | 2.2      | 2.3    | 2.35    |
| 4     | 3.15     | 2.4     | 2.7    | 2.6    | 2.15   | 2.5    | 2.8    | 2.5     | 2.55   | 2.25   | 2.65   | 2.85   | 2.75    | 2.15      | 2.75   | 2.25     | 2.3    | 2.5     |
| 8     | 3.05     | 2.4     | 2.7    | 2.55   | 2.25   | 2.5    | 2.75   | 2.5     | 2.55   | 2.15   | 2.6    | 2.8    | 2.7     | 2.1       | 2.65   | 2.3      | 2.35   | 2.55    |
| 16    | 2.95     | 2.45    | 2.8    | 2.7    | 2.4    | 2.5    | 2.9    | 2.55    | 2.65   | 2.2    | 2.6    | 2.95   | 2.9     | 2.3       | 2.95   | 2.35     | 2.4    | 2.65    |
| 20    | 2.25     | 2.3     | 2.85   | 2.55   | 2.55   |        | 3.05   | 2.7     | 2.75   | 2.4    | 2.7    | 3.1    | 3.05    | 2.45      | 3.1    | 2.45     | 2.4    | 2.8     |
| 24    | 2.3      | 2.8     | 2.9    | 2.45   | 2.5    |        | 3.1    | 2.55    | 2.35   | 2.8    | 3.2    | 3.1    | 3.1     | 2.5       | 3.05   | 2.4      | 2.05   | 2.75    |
| 28    | 2.55     | 2.65    | 2.65   | 2.05   | 2.55   |        | 3      | 2.5     | 2.35   | 2.6    | 3.15   | 2.85   | 2.35    | 3.1       | 2.4    |          |        | 2.7     |
| 32    | 2.35     | 2.4     | 2.6    | 2.4    | 2.55   |        | 2.8    | 2.4     | 2.25   | 2.55   | 3.05   | 2.65   | 2.25    | 3         | 2.25   |          |        | 2.6     |
| 36    | 2.3      |         |        | 2.7    | 2.55   |        | 3      | 2.7     | 2.1    | 2.8    | 3.2    | 3      | 2.2     | 3.25      | 2.35   |          |        | 2.9     |
| 40    |          |         |        |        |        |        | 3      | 2.5     |        | 2.95   | 3.35   | 3      | 2.3     | 3.4       | 2.55   |          |        | 2.9     |
| 44    |          |         |        |        |        |        | 2.75   | 2.6     |        | 2.9    | 3.25   | 3.25   | 3.25    | 2.45      | 3.7    | 2.6      |        | 2.95    |
| 48    |          |         |        |        |        |        | 2.5    |         |        | 2.7    | 3.4    | 3.05   | 2.4     | 3.3       | 2.5    |          |        | 2.8     |
| 52    |          |         |        |        |        |        |        | 2.7     |        | 3.2    | 3.45   | 3.2    | 2.6     | 3.35      | 2.75   |          |        | 3       |
| 56    |          |         |        |        |        |        |        | 2.55    |        | 3.25   | 3.45   | 3.05   | 2.6     | 3.55      | 2.55   |          |        | 3       |
| 60    |          |         |        |        |        |        |        | 2.5     |        | 3.2    | 3.55   | 3.05   | 2.7     | 3.7       | 2.65   |          |        | 2.9     |
| 64    |          |         |        |        |        |        |        |         |        |        |        |        |         |           |        |          |        |         |
| 0     | 37.8     | 38.1    | 38.2   | 37.6   | 37.9   | 37.8   | 38.2   | 38.3    | 36.4   | 37.1   | 37.7   | 37.4   | 37.4    | 37.5      | 36.9   | 37       | 36.5   | 37.9    |
| 4     | 38.3     | 38.5    | 38.3   | 39.6   | 37.7   | 36.2   | 37.9   | 37.3    | 37     | 37.3   | 36.8   | 37.4   | 38.4    | 38.1      | 37.5   | 38.2     | 37.7   | 37.5    |
| 8     | 39.3     | 38.2    | 38.3   | 38.8   | 37.9   | 38.6   | 38.2   | 38.1    | 37.8   | 38.2   | 38.5   | 38     | 38.5    | 38.5      | 38.2   | 38       | 37.4   | 38      |
| 16    | 38.2     | 38.2    | 37.4   | 39.5   | 38.2   | 38.5   | 38.3   | 37.8    | 37.9   | 37.5   | 38.5   | 38.5   | 37.7    | 37.9      | 37.9   | 37.7     | 38.1   | 37.8    |
| 20    | 38.8     | 36.9    | 39.1   | 38     | 38.6   |        | 37.5   | 38.4    | 35.5   | 38.5   | 38.4   | 34.7   | 37.5    | 38.6      | 37.5   | 37.8     | 37.6   | 38.1    |
| 24    | 38       | 39      | 39.3   | 37.6   | 38.2   |        | 37.5   | 37.8    |        | 37.9   | 38.4   | 37.6   | 38.6    | 38.3      | 37.8   | 38.3     | 38.4   | 38.1    |
| 28    | 37.4     | 36.3    | 36.9   | 37.1   | 38.1   |        | 37.8   | 37.8    |        | 37.6   | 37.7   | 38     | 37.6    | 37.5      | 38.4   | 37.8     |        | 37.3    |
| 32    | 36.7     | 34.4    | 37.8   | 37.6   | 37.5   |        | 37.6   | 37.9    |        | 38     | 38     | 37.9   | 38.3    | 38.2      | 37.3   | 37.9     |        | 38      |
| 36    | 36.8     |         |        | 38     | 38.6   |        | 37.9   | 37.8    |        | 37.8   | 38.7   | 37.9   | 38.1    | 38.2      | 38     | 37.4     |        | 38      |
| 40    |          |         |        |        |        |        | 36.9   | 36.7    |        |        | 38.7   | 37.9   | 37.6    | 37.6      | 36.8   | 37.2     |        | 37.1    |
| 44    |          |         |        |        |        |        |        | 38      |        |        | 37.1   | 37.6   | 37.9    | 37.7      | 37.8   | 37.2     |        | 37.8    |
| 48    |          |         |        |        |        |        |        | 37.5    |        |        | 37.2   | 36.5   | 37.4    | 38.4      | 37.9   | 38       |        | 37.8    |
| 52    |          |         |        |        |        |        |        | 35.1    |        |        | 37.5   | 36.8   | 37.1    | 37.4      | 37.8   | 37.1     |        | 37.2    |
| 56    |          |         |        |        |        |        |        | 38.4    |        |        | 38.3   | 38.3   | 38.2    | 38        | 38     | 37.1     |        | 38.1    |
| 60    |          |         |        |        |        |        |        | 38.3    |        |        | 37.5   | 38.2   | 38      | 38.2      | 37.9   | 37.8     |        | 37.5    |
| 64    |          |         |        |        |        |        |        |         |        |        |        |        |         |           |        |          |        |         |
| 0     | 0        | 0       | 1      | 0      | 1      | 0      | 0      | 0       | 0      | 0      | 0      | 0      | 0       | 0         | 0      | 0        | 0      | 1       |
| 4     | 0        | 0       | 2      | 0      | 0      | 0      | 1      | 0       | 0      | 0      | 0      | 2      | 0       | 0         | 0      | 0        | 1      | 1       |
| 8     | 5        | 0       | 0      | 0      | 0      | 0      | 0      | 0       | 1      | 0      | 0      | 0      | 0       | 0         | 0      | 0        | 1      | 1       |
| 16    | 10       | 0       | 3      | 0      | 0      | 4      | 0      | 0       | 3      | 0      | 2      | 0      | 1       | 0         | 0      | 0        | 5      | 0       |
| 20    | 0        | 3       | 0      | 0      | 2      |        | 1      | 0       | 3      | 1      | 0      | 0      | 0       | 0         | 0      | 0        | 13     | 0       |
| 24    | 0        | 4       | 2      | 0      | 7      |        | 0      | 0       | 0      | 0      | 0      | 1      | 0       | 0         | 0      | 0        | 5      | 0       |
| 28    | 0        | 21      | 9      | 0      | 6      |        | 0      | 0       | 5      | 0      | 0      | 0      | 0       | 0         | 1      | 0        |        | 0       |
| 32    | 0        | 9       | 24     | 0      | 2      |        | 0      | 0       | 7      | 0      | 0      | 0      | 0       | 0         | 0      | 0        |        | 1       |
| 36    | 20       |         | 11     | 2      | 2      |        | 1      | 0       | 10     | 0      | 0      | 0      | 0       | 0         | 1      | 1        |        | 0       |
| 40    |          |         |        |        |        |        | 4      | 1       |        | 3      | 1      | 0      | 0       | 2         | 0      | 0        |        | 2       |
| 44    |          |         |        |        |        |        |        | 1       |        | 3      | 1      | 0      | 0       | 0         | 0      | 0        |        | 1       |
| 48    |          |         |        |        |        |        | 0      |         |        | 0      | 0      | 0      | 0       | 0         | 0      | 0        |        | 1       |
| 52    |          |         |        |        |        |        | 0      |         |        | 0      | 0      | 0      | 0       | 0         | 0      | 1        |        | 0       |
| 56    |          |         |        |        |        |        | 0      |         |        | 0      | 0      | 0      | 0       | 0         | 0      | 0        |        | 0       |
| 60    |          |         |        |        |        |        | 0      |         |        | 0      | 0      | 0      | 0       | 0         | 1      | 0        |        | 0       |
| 64    |          |         |        |        |        |        | 0      |         |        | 0      | 0      | 0      | 0       | 1         | 0      | 0        |        | 0       |
| 0     | (-)      | (-)     | (-)    | (-)    | (-)    | (-)    | (-)    | (-)     | (-)    | (-)    | (-)    | (-)    | (-)     | (-)       | (-)    | (-)      | (-)    | (-)     |
| 4     | BP(u)    | BP(u)   | (-)    | (-)    | (-)    | (-)    | (-)    | SN      | (-)    | (-)    | (-)    | (-)    | (-)     | (-)       | (-)    | (-)      | (-)    | (-)     |
| 8     | (-)      | BP(b)   | (-)    | (-)    | (-)    | (-)    | (-)    | SN      | (-)    | (-)    | (-)    | (-)    | (-)     | (-)       | (-)    | (-)      | (-)    | (-)     |
| 16    | (-)      | BP(b)   | BP(At) | (-)    | BP(b)  | BP(u)  | (-)    | SN      | BP(u)  | BP(b)  | (-)    | (-)    | (-)     | (-)       | (-)    | (-)      | BP(b)  | (-)     |
| 20    | (-)      | BP(b)   | BP     | (-)    | BP(b)  |        | (-)    | SN      | BP(b)  | BP(b)  | BP(u)  | (-)    | SN      | (-)       | (-)    | (-)      | BP(b)  | (-)     |
| 24    | SN       | BP(b)   | BP/At  | SN     | BP(b)  |        | (-)    | SN      | BP(b)  | BP(b)  | BP(u)  | (-)    | (-)     | (-)       | (-)    | (-)      | BP/Con | (-)     |
| 28    | SN       | BP(b)   | BP/At  | BP(u)  | BP(b)  |        | (-)    | SN      | BP(b)  | BP(b)  | BP(u)  | (-)    | (-)     | (-)       | (-)    | (-)      | (-)    | (-)     |
| 32    | (-)      | BP(b)   | BP/At  | BP(u)  | BP(b)  |        | (-)    | SN      | BP(b)  | BP(b)  | BP(u)  | (-)    | (-)     | (-)       | (-)    | (-)      | (-)    | (-)     |
| 36    | (-)      |         | BP/At  | BP(u)  | BP(b)  |        | (-)    | SN      | BP/Con | BP(u)  | (-)    | (-)    | (-)     | (-)       | (-)    | (-)      | (-)    | (-)     |
| 40    |          |         |        |        |        |        | (-)    | SN      | BP/Con | BP(u)  | (-)    | (-)    | (-)     | (-)       | (-)    | (-)      | (-)    | (-)     |
| 44    |          |         |        |        |        |        | (-)    | SN      |        | BP(u)  | (-)    | (-)    | (-)     | (-)       | (-)    | (-)      | (-)    | (-)     |
| 48    |          |         |        |        |        |        |        | BP(u)   |        | BP(u)  | (-)    | (-)    | (-)     | (-)       | (-)    | (-)      | (-)    | (-)     |
| 52    |          |         |        |        |        |        |        | (-)     |        | BP(u)  | (-)    | (-)    | (-)     | (-)       | (-)    | (-)      | (-)    | (-)     |
| 56    |          |         |        |        |        |        |        | (-)     |        | BP(u)  | (-)    | (-)    | (-)     | (-)       | (-)    | (-)      | (-)    | (-)     |
| 60    |          |         |        |        |        |        |        | (-)     |        | BP(u)  | (-)    | (-)    | (-)     | (-)       | (-)    | (-)      | (-)    | (-)     |
| 64    |          |         |        |        |        |        |        | (-)     |        | BP(u)  | (-)    | (-)    | (-)     | (-)       | (-)    | (-)      | (-)    | (-)     |

59 **Supplemental table 2. Pathology scores at necropsy after high dose challenge**

60 Gross pathology in lungs and other organs. Pathology scores (maximum score is 10) given as  
 61 individual organ scores of lungs and other organs in the vaccine and control groups after infection  
 62 with *M. tuberculosis*. “Additional organs” include Pericardium, Stomach and bone.

| Animal number    | SCORE | RT. LUNG | LF. LUNG | SPLEEN | KIDNEY | LIVER | PERICARDIUM | STOMACH | BONE | THORACIC LYPMH N. |
|------------------|-------|----------|----------|--------|--------|-------|-------------|---------|------|-------------------|
| <b>Non-vacc.</b> |       |          |          |        |        |       |             |         |      |                   |
| 6651 D           | 22    | 7        | 7        | 7      | 0      | 0     | 0           | 0       | 0    | 1                 |
| 3008 L           | 19    | 3        | 0        | 3      | 0      | 7     | 0           | 0       | 6    | 0                 |
| 5566 E           | 24    | 7        | 6        | 3      | 0      | 4     | 0           | 0       | 4    | 0                 |
| 8197 A           | 30    | 10       | 7        | 4      | 0      | 5     | 0           | 0       | 4    | 0                 |
| 2861 I           | 08    | 2        | 2        | 0      | 2      | 0     | 0           | 0       | 0    | 2                 |
| 7156 C           | 16    | 4        | 4        | 3      | 3      | 2     | 0           | 0       | 0    | 0                 |
| <b>BCG</b>       |       |          |          |        |        |       |             |         |      |                   |
| 7705 B           | 02    | 0        | 2        | 0      | 0      | 0     | 0           | 0       | 0    | 0                 |
| 6784 C           | 00    | 0        | 0        | 0      | 0      | 0     | 0           | 0       | 0    | 0                 |
| 7947 B           | 27    | 10       | 9        | 5      | 3      | 0     | 0           | 0       | 0    | 0                 |
| 197 BJ           | 35    | 10       | 7        | 0      | 5      | 7     | 2           | 0       | 4    | 0                 |
| 4418 J           | 09    | 7        | 0        | 2      | 0      | 0     | 0           | 0       | 0    | 0                 |
| 5985 C           | 00    | 0        | 0        | 0      | 0      | 0     | 0           | 0       | 0    | 0                 |
| <b>BCH/H56</b>   |       |          |          |        |        |       |             |         |      |                   |
| 8262 A           | 00    | 0        | 0        | 0      | 0      | 0     | 0           | 0       | 0    | 0                 |
| S4708 EC         | 00    | 0        | 0        | 0      | 0      | 0     | 0           | 0       | 0    | 0                 |
| 5923 D           | 00    | 0        | 0        | 0      | 0      | 0     | 0           | 0       | 0    | 0                 |
| S2934 N          | 05    | 0        | 5        | 0      | 0      | 0     | 0           | 0       | 0    | 0                 |
| 7531 C           | 34    | 10       | 10       | 4      | 0      | 3     | 0           | 0       | 4    | 3                 |
| 1290 GE          | 00    | 0        | 0        | 0      | 0      | 0     | 0           | 0       | 0    | 0                 |
